# Supplementary material
Source: PubMed Central journal article supplement (PMC10992107)
Supplement: 262_2021_2946_MOESM1_ESM.pdf [file 262_2021_2946_MOESM1_ESM.pdf]

## Supplementary Figures

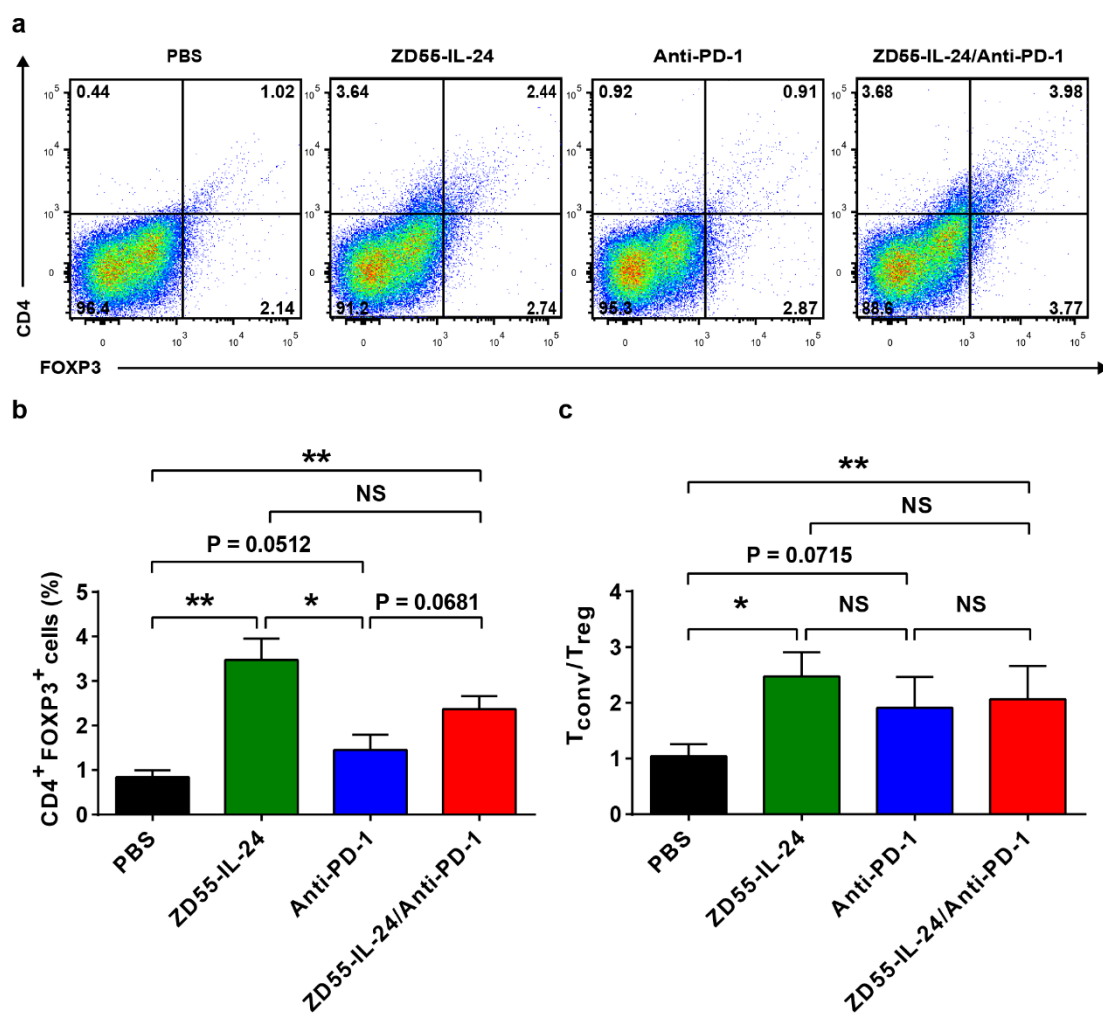

**Supplementary Figure 1** ZD55-IL-24 is unable to help PD-1 blockade to further increase the  $T_{conv}/T_{reg}$  ratio in local tumors. C57BL/6 mice were treated as indicated in **Fig. 1a**, and then the tumor cells were isolated for flow cytometry analysis. **(a)** Representative flow cytometry plots of tumor-infiltrating  $T_{conv}$  cells ( $CD4^+FOXP3^-$ ) and  $T_{reg}$  cells ( $CD4^+FOXP3^+$ ). **(b)** Percentages of  $T_{reg}$  cells in tumors. **(c)** Calculated  $T_{conv}/T_{reg}$  ratio. Mean  $\pm$  SEM is shown. Data represent cumulative results from seven independent experiments

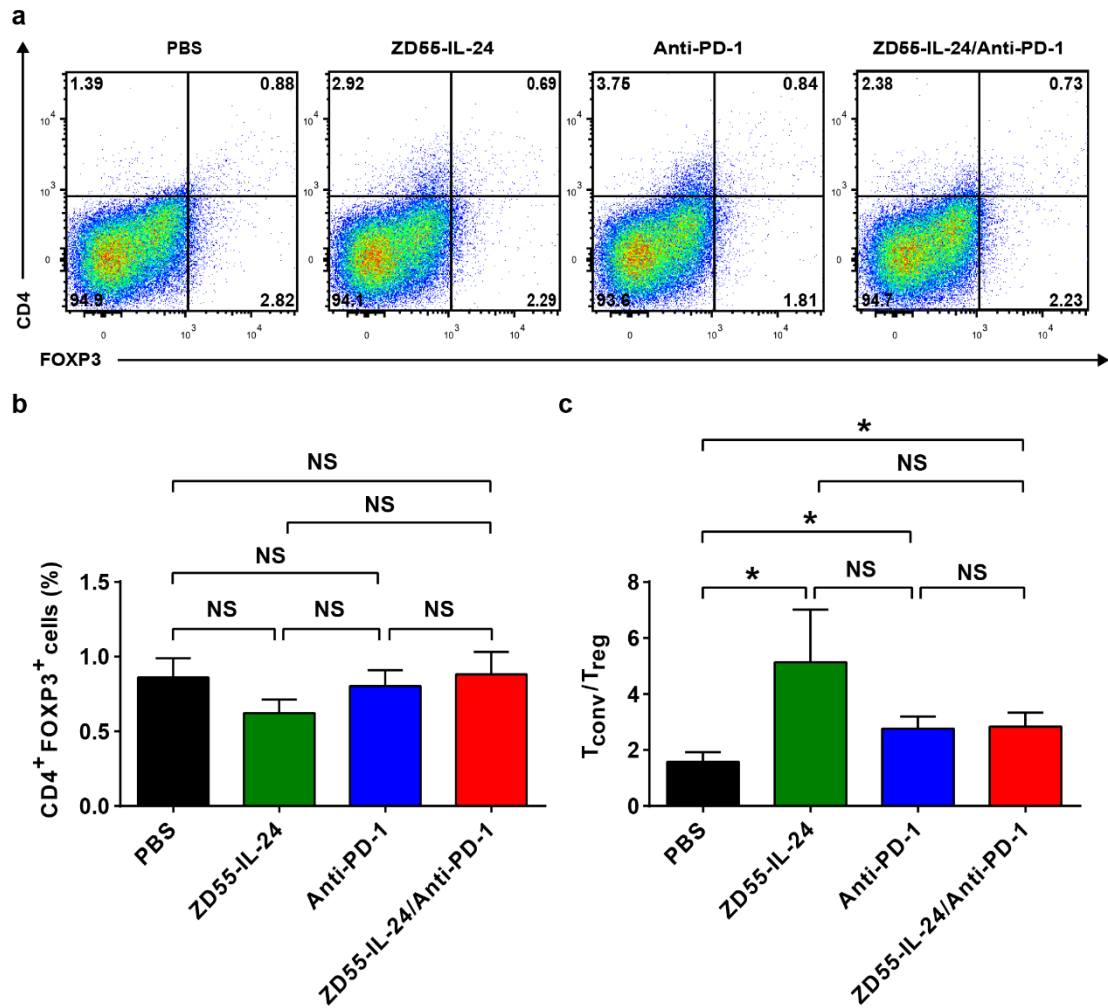

**Supplementary Figure 2** ZD55-IL-24 is also unable to help PD-1 blockade to further increase the  $T_{conv}/T_{reg}$  ratio in distant tumors. C57BL/6 mice were treated as indicated in **Fig. 3a**, and then the left flank tumors were resected from the sacrificed mice for flow cytometry analysis. **(a)** Representative flow cytometry plots of tumor-infiltrating  $T_{conv}$  cells and  $T_{reg}$  cells. **(b)** Percentages of  $T_{reg}$  cells in distant tumors. **(c)** Calculated  $T_{conv}/T_{reg}$  ratio in distant tumors. Mean  $\pm$  SEM is shown. Data represent cumulative results from seven independent experiments

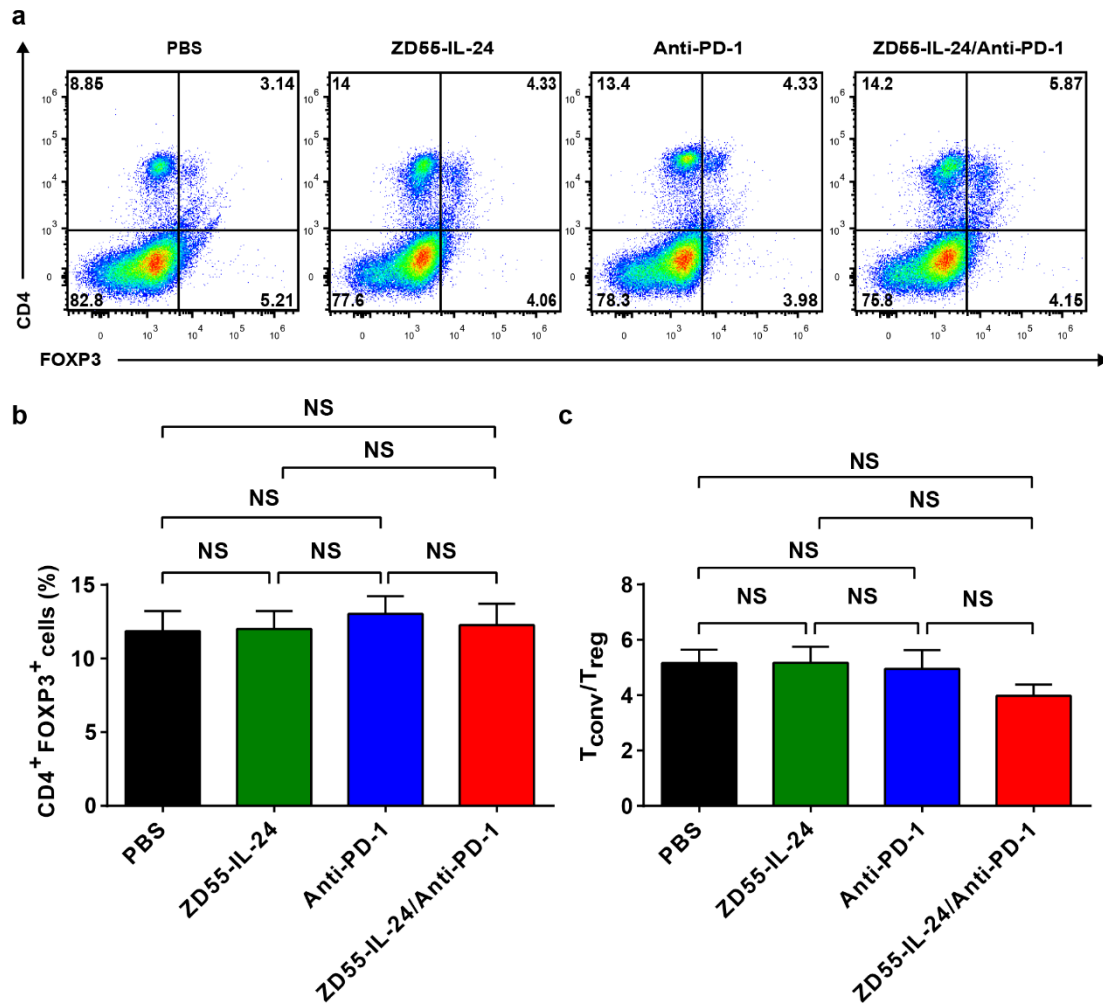

**Supplementary Figure 3** ZD55-IL-24 can't help PD-1 blockade to further increase the  $T_{conv}/T_{reg}$  ratio in spleens as well. C57BL/6 mice were treated as indicated in **Fig. 3a**, and then the spleen cells were isolated for flow cytometry analysis. **(a)** Representative flow cytometry plots of tumor-infiltrating  $T_{conv}$  cells and  $T_{reg}$  cells in spleens. **(b)** Percentages of  $T_{reg}$  cells in spleens. **(c)** Calculated  $T_{conv}/T_{reg}$  ratio in spleens. Mean  $\pm$  SEM is shown. Data represent cumulative results from seven independent experiments
